# Supplementary material for: BMX/Etk promotes cell proliferation and tumorigenicity of cervical cancer cells through PI3K/AKT/mTOR and STAT3 pathways
Source: PubMed Central journal article supplement (PMC5564764; doi:10.18632/oncotarget.17493), 2017-04-27
Supplement: oncotarget-08-49238-s001.pdf [file oncotarget-08-49238-s001.pdf]

# BMX/Etk promotes cell proliferation and tumorigenicity of cervical cancer cells through PI3K/AKT/mTOR and STAT3 pathways

## Supplementary Materials

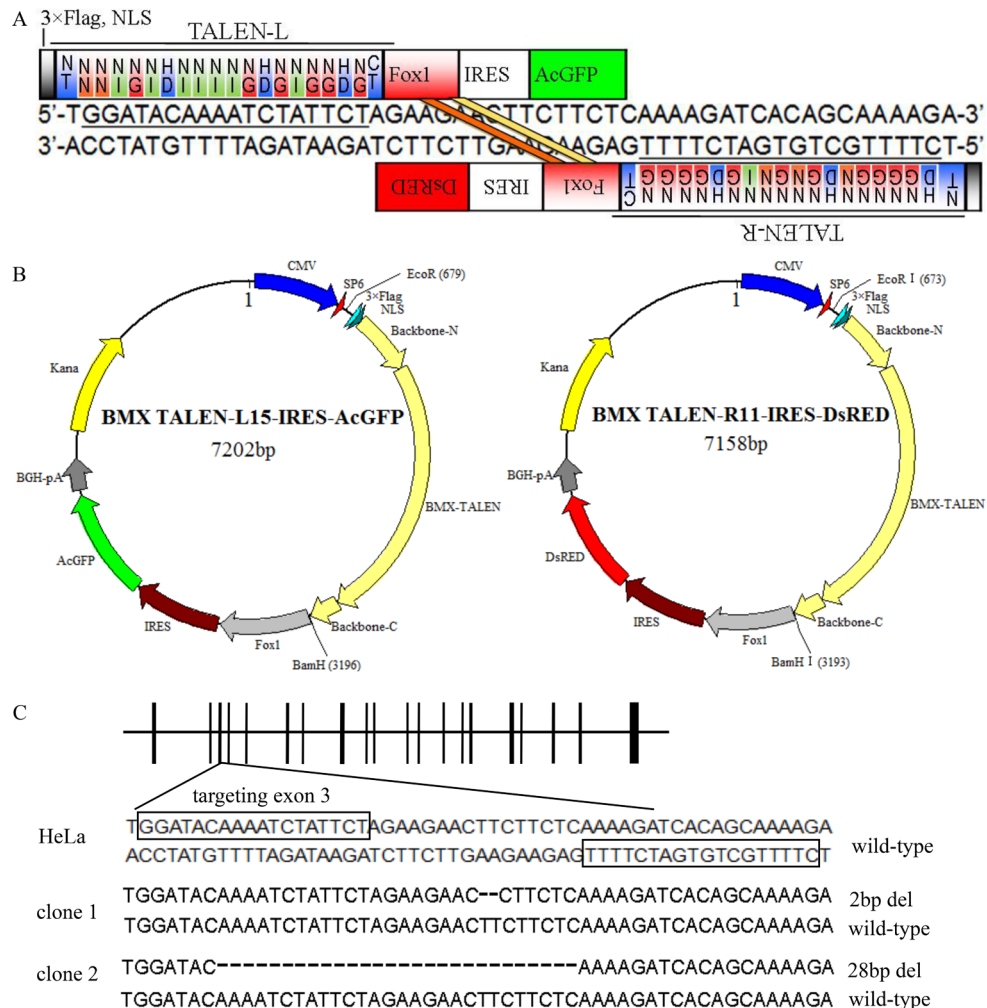

**Supplementary Figure 1: Efficient and rapid BMX-expressing changed clones were successfully achieved.** (A) Schematic overview depicting the strategy for targeting the BMX gene using TALENs, which is annotated with the following codes: (NI = A, HD = C, NN = G, NG = T) [61]. AcGFP, green fluorescent protein; DsRed, red fluorescent protein; NLS, nuclear localization signal; TALEN-L, TALE repeat monomers that binds to the left target sequence; TALEN-R, TALE repeat monomers that bind to the right target sequence. (B) The BMX-TALEN plasmids (BMX-TALEN-L15-IRES-AcGFP and BMX-TALEN-R11-IRES-DsRED) are shown. (C) Generation of BMX frameshift mutant clones with TALENs targeting exon 3 in HeLa cells. Boxes indicate the TALEN targeting sequence. The 2 bp and 28 bp deletions in one allele of the clones are indicated.

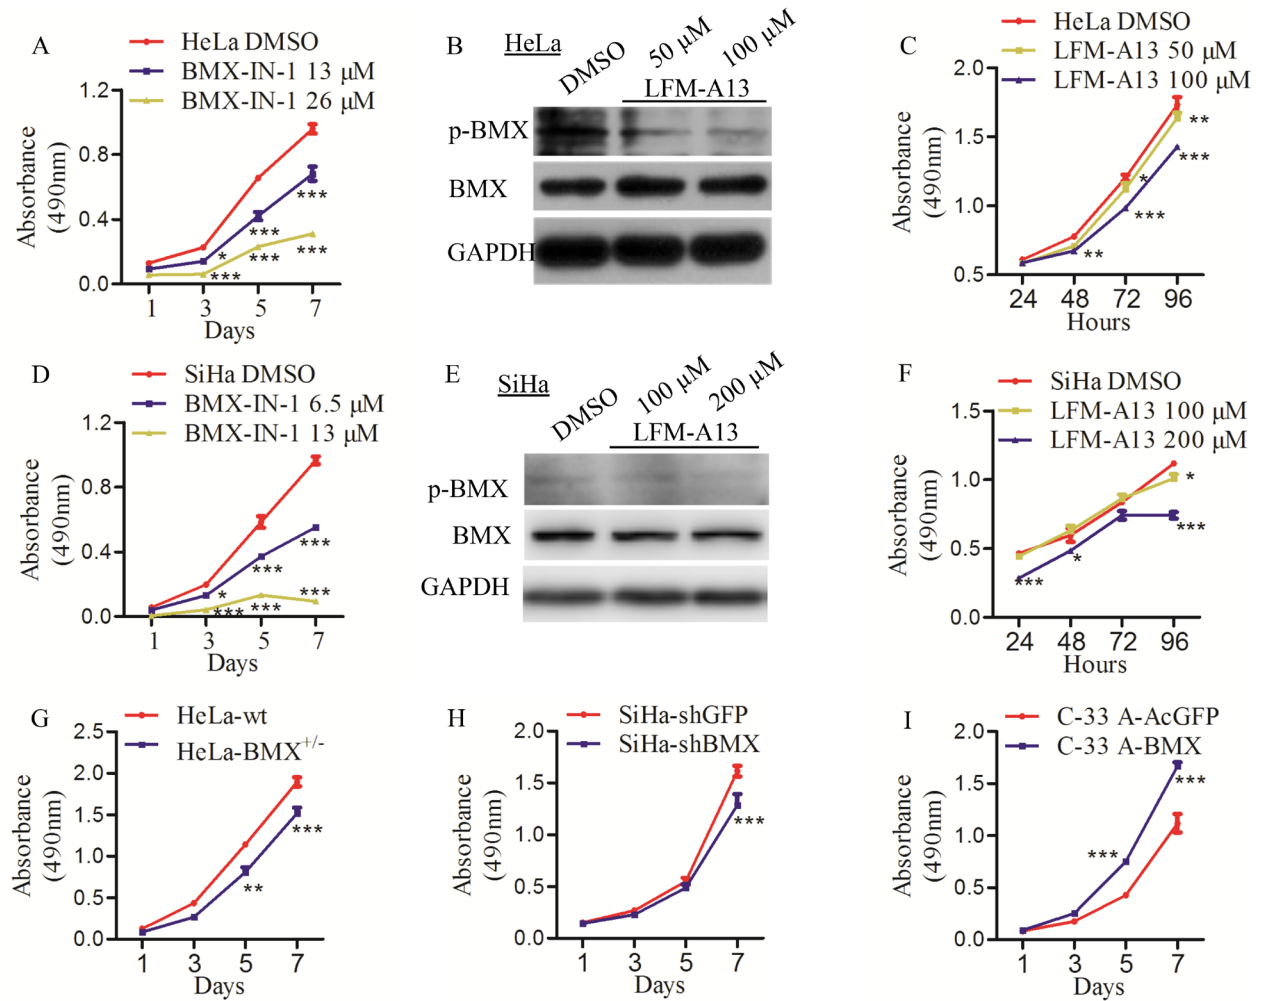

**Supplementary Figure 2: Cell viability was detected by MTT in BMX-expression changed cells *in vitro*.** (A) HeLa and (D) SiHa cells were treated with DMSO, and BMX-IN-1 at an appropriate dose, MTT was used to assess the viability at day 1, 3, 5 and 7. (B) HeLa and (E) SiHa cells were treated with DMSO and LFM-A13, a pharmacologic inhibitor of BMX, and the phosphorylation and total BMX levels were determined using a western blot analysis. (C) HeLa and (F) SiHa cells were treated with DMSO and LFM-A13, MTT was used to assess the viability at the 24 h, 48 h, 72 h and 96 h time points. The viability of (G) HeLa-wt/BMX<sup>+/-</sup>, (H) SiHa-shGFP/shBMX and (I) C-33A-AcGFP/C-33A-BMX cells was detected by MTT assay. Values are shown as the mean $\pm$ SEM from three independent experiments (*t*-test, \**p* < 0.05, \*\**p* < 0.01, \*\*\**p* < 0.001 vs the corresponding control).

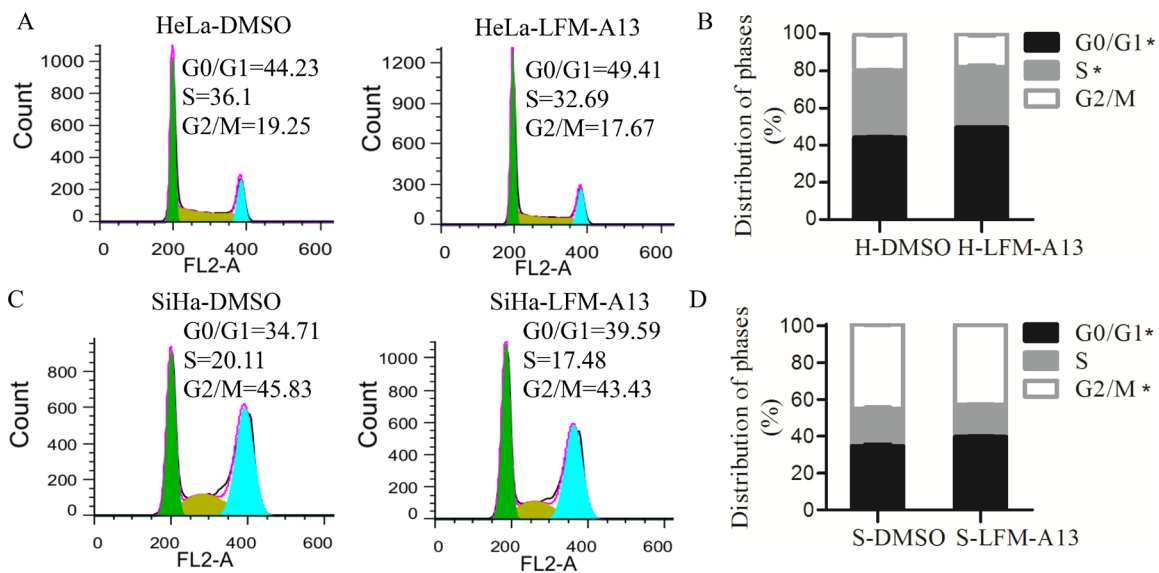

**Supplementary Figure 3: Cell cycle distribution after treated with LFM-A13.** (A) Pretreated HeLa cells with DMSO and 50  $\mu$ M LFM-A13, the cell cycle distribution was analyzed using flow cytometry analysis, and the statistical analysis is shown in (B). (C) Pretreated SiHa cells with DMSO and 200  $\mu$ M LFM-A13, the cell cycle distribution was analyzed, and the statistical analysis is shown in (D). A *t*-test was used for the statistical analysis, \* $p < 0.05$ , \*\* $p < 0.01$ .

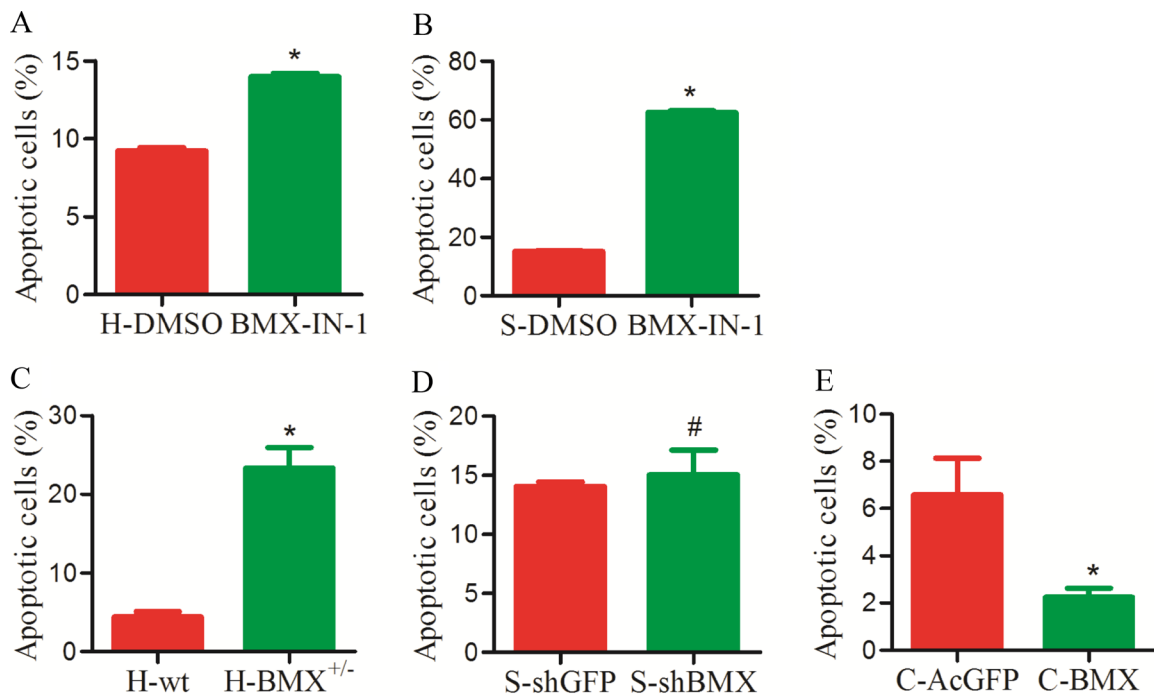

**Supplementary Figure 4: Apoptotic cells analyzed when the expression changed of BMX through pharmacological and genetic manipulation.** Treated HeLa cells with DMSO and 26  $\mu$ M BMX-IN-1 (A), SiHa cells with DMSO and 13  $\mu$ M BMX-IN-1 (B), respectively, the apoptotic cells were detected using flow cytometry analysis, and the statistical analysis was shown. The apoptotic cells of HeLa-wt/HeLa-BMX<sup>+/-</sup> (C), SiHa-shGFP/SiHa-shBMX (D), and C-33A-AcGFP/C-33A-BMX (E) cells were analyzed. A *t*-test was used for the statistical analysis, \* $p < 0.05$ , # $p > 0.05$ .

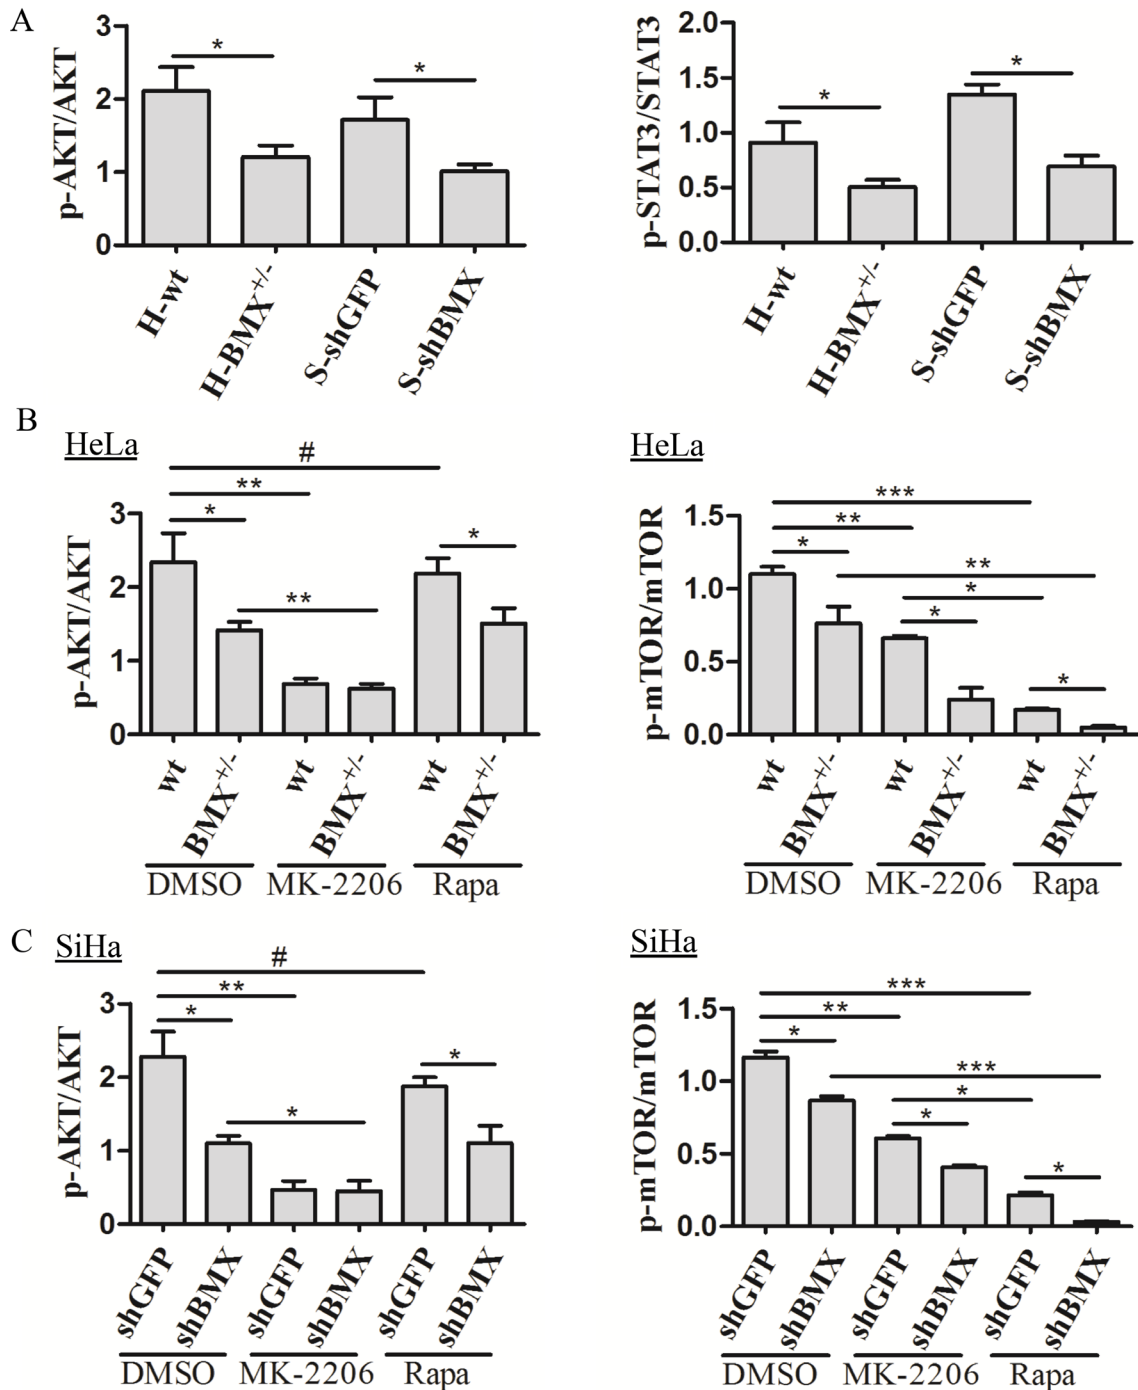

**Supplementary Figure 5: BMX activated the phosphorylation of AKT/mTOR and STAT3.** (A) The relative quantitative analysis of Figure 5A. Comparisons of p-AKT/AKT (Left) and p-STAT3/STAT3 (Right) was shown in HeLa-wt/HeLa-BMX<sup>+/-</sup> and SiHa-shGFP cells. (B) The relative quantitative analysis of Figure 5B. Comparisons of p-AKT/AKT (Left) and p-mTOR/mTOR (Right) was shown in HeLa-wt/HeLa-BMX<sup>+/-</sup> cells treated with DMSO, the selective AKT inhibitor MK-2206 and mTOR inhibitor rapamycin. (C) The relative quantitative analysis of Figure 5C. Comparisons of p-AKT/AKT (Left) and p-mTOR/mTOR (Right) was shown in SiHa-shGFP/SiHa-shBMX cells treated with DMSO, the selective AKT inhibitor MK-2206 and mTOR inhibitor rapamycin. The data were determined using a t-test, and are shown as the mean  $\pm$  SEM. \* $p < 0.05$ , \*\* $p < 0.01$ , \*\*\* $p < 0.001$ , # $p > 0.05$ .
